# Supplementary material for: Cushing’s syndrome driver mutation disrupts protein kinase A allosteric network, altering both regulation and substrate specificity
Source: PubMed Central journal article supplement — Sci Adv. 2019 Aug 28;5(8):eaaw9298. doi: 10.1126/sciadv.aaw9298 (PMC6713507; doi:10.1126/sciadv.aaw9298), 2019-08-28
Supplement: aaw9298_SM.pdf [file aaw9298_SM.pdf]

## Supplementary Materials for

### **Cushing's syndrome driver mutation disrupts protein kinase A allosteric network, altering both regulation and substrate specificity**

Caitlin Walker, Yingjie Wang, Cristina Olivieri, Adak Karamafrooz, Jordan Casby, Kerstin Bathon, Davide Calebiro, Jiali Gao, David A. Bernlohr, Susan S. Taylor, Gianluigi Veglia\*

\*Corresponding author. Email: vegli001@umn.edu

Published 28 August 2019, *Sci. Adv.* **5**, eaaw9298 (2019)  
DOI: 10.1126/sciadv.aaw9298

#### **This PDF file includes:**

Fig. S1. [<sup>1</sup>H, <sup>15</sup>N]-TROSY-HSQC spectra for PKA-C<sup>WT</sup> and PKA-C<sup>L205R</sup> in apo, ATP<sub>γ</sub>N, and ATP<sub>γ</sub>N/PKI-bound and ATP<sub>γ</sub>N/VPS36-bound forms.

Fig. S2. CSPs observed upon ligand binding for PKA-C<sup>WT</sup> and PKA-C<sup>L205R</sup>.

Fig. S3. Intensity plot for the binding of VPS36 to ATP<sub>γ</sub>N-saturated PKA-C<sup>L205R</sup>.

Fig. S4. PCA of the catalytic lobes in PKA-C<sup>WT</sup> and PKA-C<sup>L205R</sup>.

Fig. S5. Probability of the formation of inter-residue contact and ΔRMSF of PKA-C upon forming ternary complexes with PKI<sub>5-24</sub> or VPS36.

Fig. S6. Allosteric changes upon peptide binding revealed by MD simulation and mutual information (MutInf) analysis.

Table S1. Changes in enthalpy, entropy, free energy, and dissociation constant of binding ATP<sub>γ</sub>N, PKI<sub>5-24</sub>, and VPS36 for PKA-C<sup>WT</sup> and PKA-C<sup>L205R</sup>.

Table S2. Kinetic parameters of Kemptide and VPS36 phosphorylation by PKA-C<sup>WT</sup> and PKA-C<sup>L205R</sup>.

Table S3. PCA and SD of the CONCISE analysis of the structural states analyzed.

Table S4. *T<sub>m</sub>* as determined using CD.

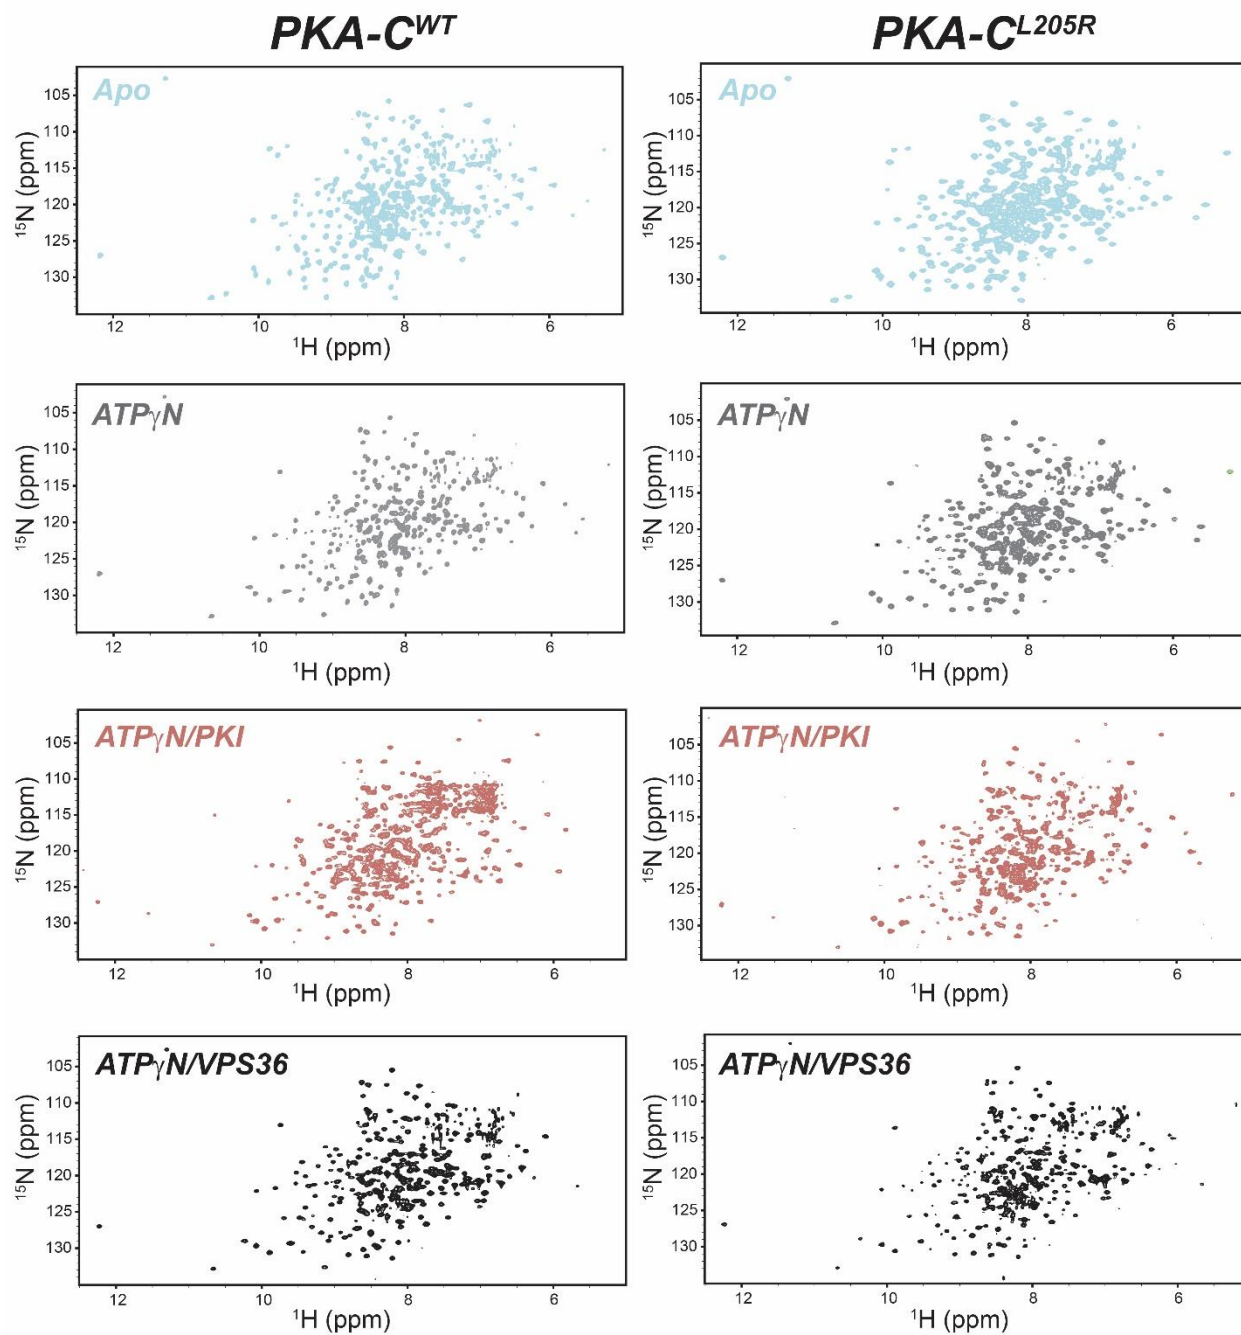

**Fig. S1. [<sup>1</sup>H, <sup>15</sup>N]-TROSY-HSQC spectra for PKA-C<sup>WT</sup> and PKA-C<sup>L205R</sup> in apo, ATP<sub>γ</sub>N, and ATP<sub>γ</sub>N/PKI-bound and ATP<sub>γ</sub>N/VPS36-bound forms.**

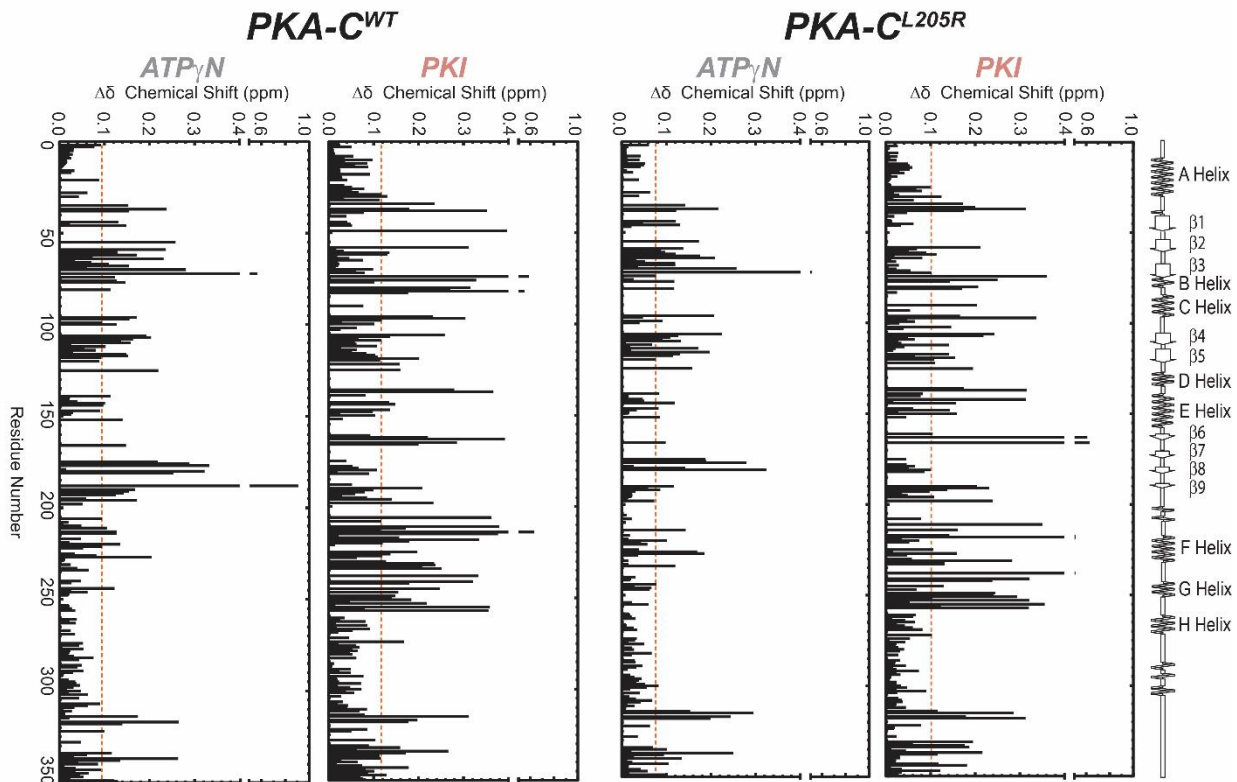

**Fig. S2. CSPs observed upon ligand binding for PKA-C<sup>WT</sup> and PKA-C<sup>L205R</sup>.** Histograms show the combined <sup>1</sup>H/<sup>15</sup>N chemical shift perturbations vs. residue. The cutoff for the average  $\Delta\delta$  are given as an orange dashed line.

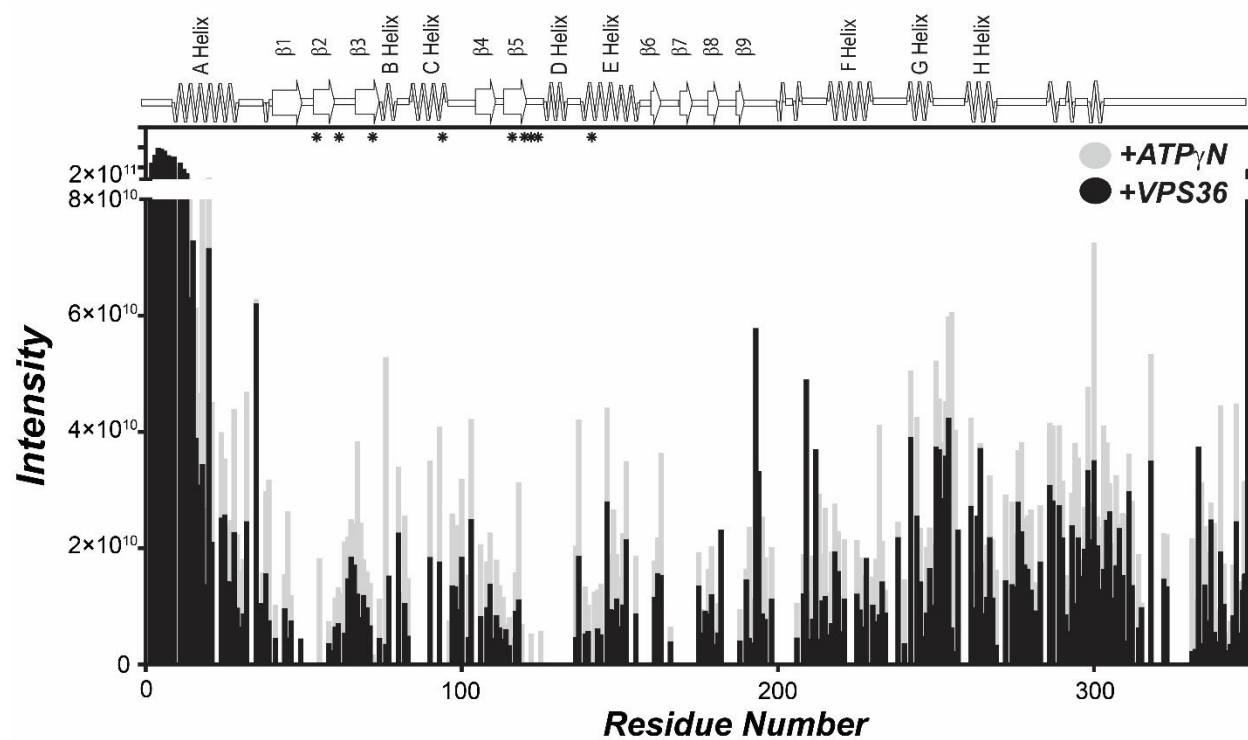

**Fig. S3. Intensity plot for the binding of VPS36 to ATP $\gamma$ N-saturated PKA-CL205R.** Asterisks indicate residues that are broadened beyond detection. Intensity was corrected to account for the increase in number of scans following addition of VPS36 and was normalized to the noise level.

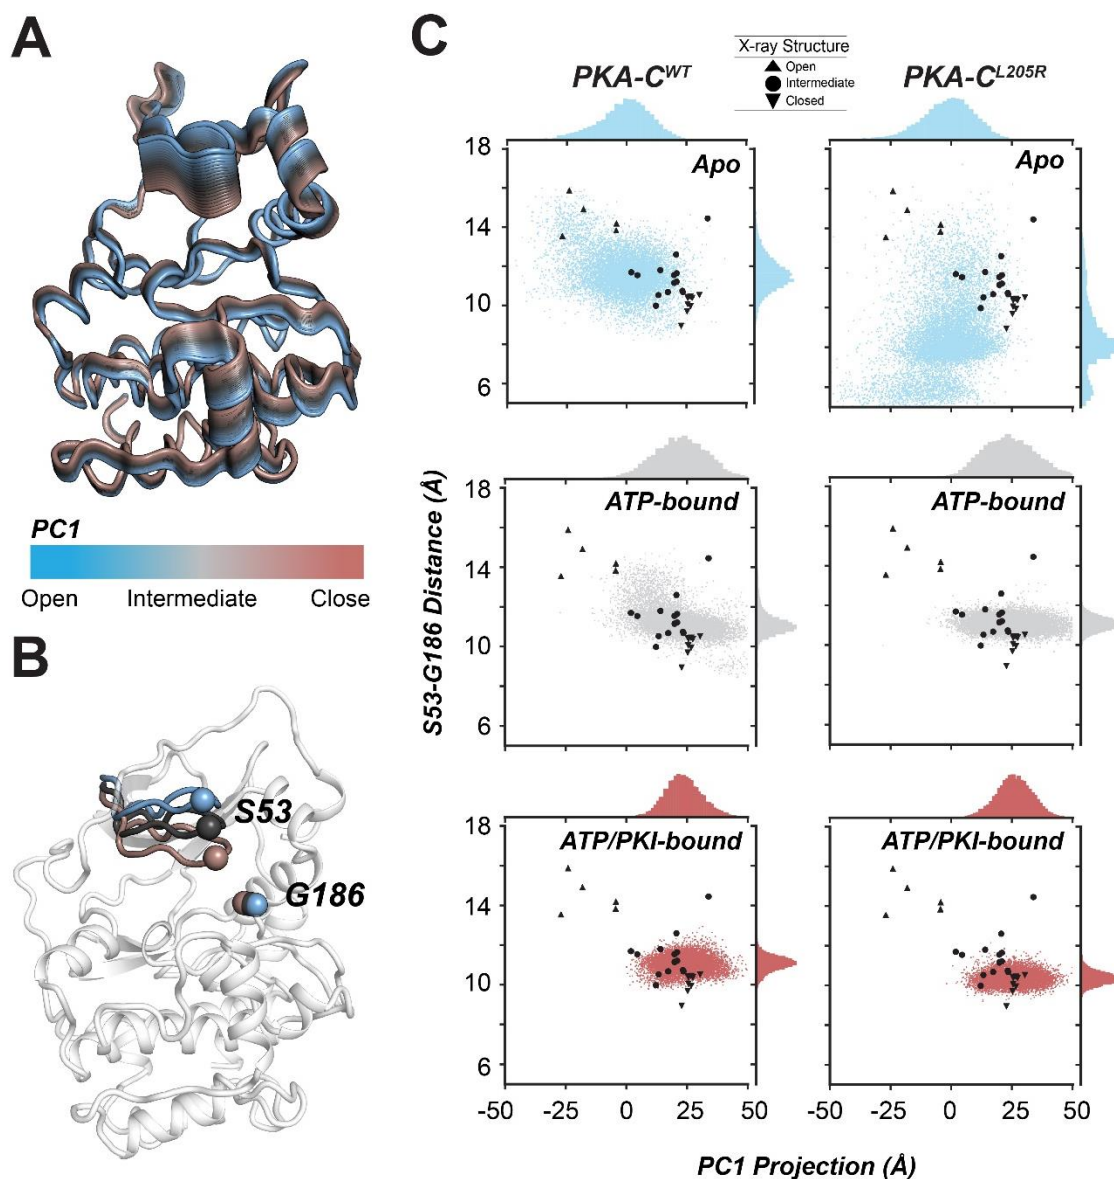

**Fig. S4. PCA of the catalytic lobes in PKA-C<sup>WT</sup> and PKA-C<sup>L205R</sup>.** (A) The first principal component of the catalytic lobes differentiates the open, intermediate and closed conformations. (B) The distances between C $\alpha$  of S53 and G186 characterize the motion of Gly-rich loop. (C) 2D-scattering plot along dS53-G186 and PC1, and the corresponding distribution plots for PKA-C<sup>WT</sup> (cyan), PKA-C<sup>WT</sup>/ATP (gray) and PKA-C<sup>WT</sup>/ATP/PKI (dark pink). Right panel: 2D-scattering plot along dS53-G186 and PC1, and the corresponding distribution plots for PKA-C<sup>L205R</sup> (cyan), PKA-C<sup>L205R</sup>/ATP (gray) and PKA-C<sup>L205R</sup>/ATP/PKI (dark pink). The black shapes correspond to the projection of crystallographic conformations.

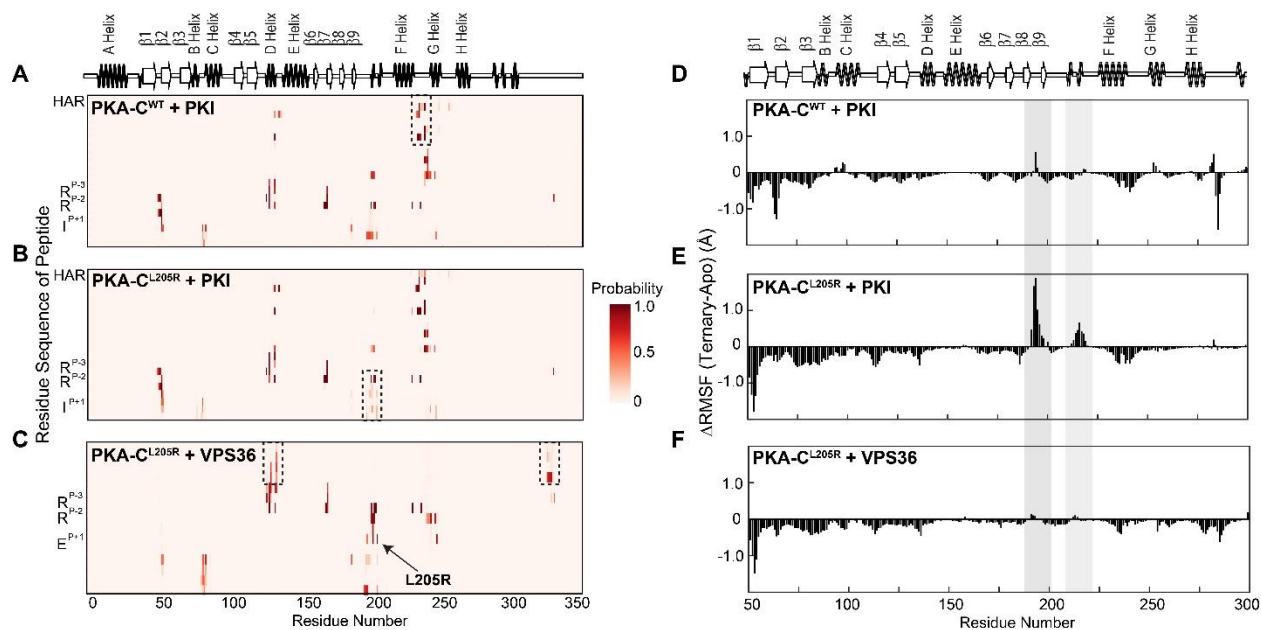

**Fig. S5. Probability of the formation of inter-residue contact and  $\Delta$ RMSF of PKA-C upon forming ternary complexes with PKI<sub>5-24</sub> or VPS36.** The probability distribution of the distances for (A) PKA-C<sup>WT</sup> and PKI highlighting stable contact between HAR of PKI and C-lobe of PKA-C<sup>WT</sup>, (B) PKA-C<sup>L205R</sup> and PKI highlighting the weakened interaction around the activation loop of PKA-C<sup>L205R</sup>, and (C) PKA-C<sup>L205R</sup> and VPS36 highlighting the stable contact at R205 and the transient contact of the N-terminal region of VPS36 with the hinge region and C-terminal tail of PKA-C<sup>L205R</sup>. The probability distribution of the distances is defined by a cutoff of 5 Å between heavy atoms of residue pairs. The  $\Delta$ RMSF of (D) PKA-C<sup>WT</sup> against the apo state upon forming ternary complex with PKI, (E) PKA-C<sup>L205R</sup> against apo state upon forming ternary complex with PKI, and (F) PKA-C<sup>L205R</sup> against apo state upon forming ternary complex with VPS36.

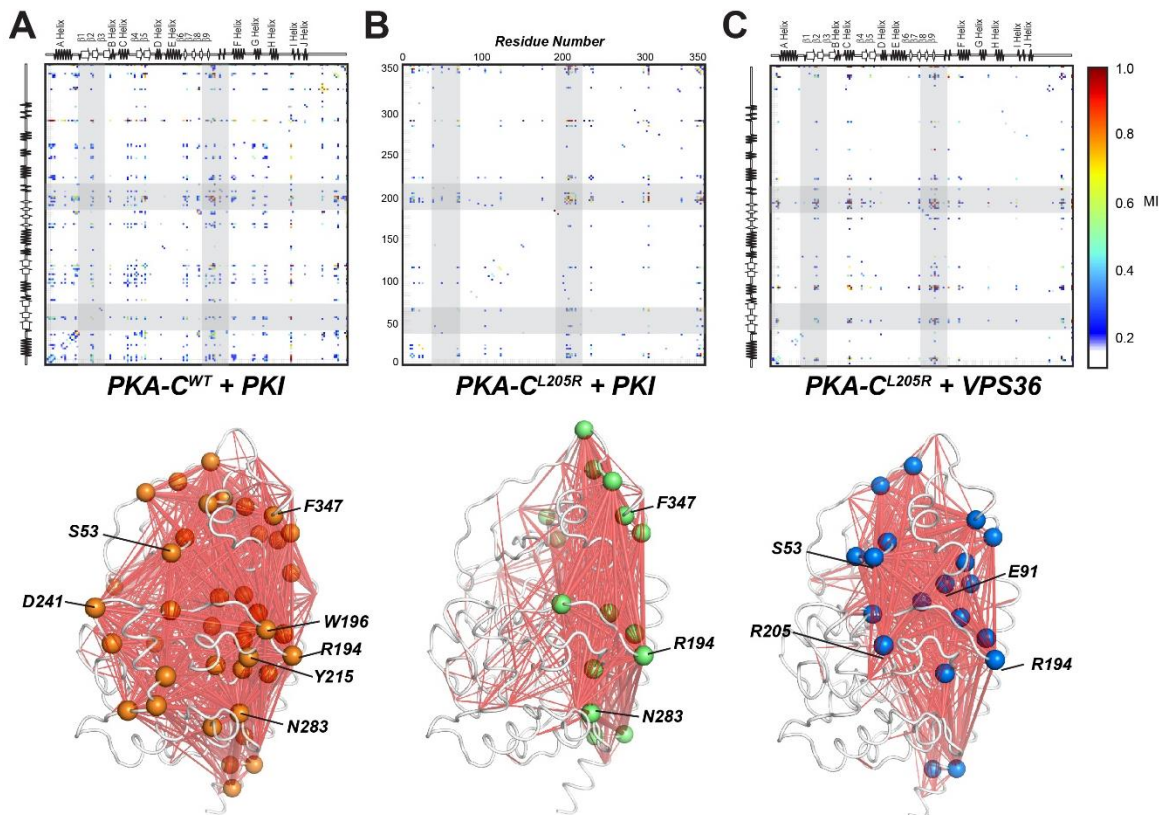

**Fig. S6. Allosteric changes upon peptide binding revealed by MD simulation and mutual information (MutInf) analysis.** Mutinf matrices of (A) PKA-C<sup>WT</sup> in complex with PKI, (B) PKA-C<sup>L205R</sup> in complex with PKI, and (C) PKA-C<sup>L205R</sup> in complex with VPS36. Mutinf matrices are mapped to the structures of PKA-C<sup>WT</sup> and PKA-C<sup>L205R</sup> with a cutoff of 0.15.

**Table S1. Changes in enthalpy, entropy, free energy, and dissociation constant of binding ATP $\gamma$ N, PKI<sub>5-24</sub>, and VPS36 for PKA-C<sup>WT</sup> and PKA-C<sup>L205R</sup>.** Errors in  $\Delta G$ ,  $\Delta H$ ,  $-T\Delta S$ , and  $K_d$  were calculated using triplicate measurements. Errors in  $\sigma$  were propagated from error in  $K_d$ . ND (not detected) indicates that the heat released upon binding is below the detection of the instrument. N/A indicates the value is not applicable to the particular measurements.

| <b>ATP<math>\gamma</math>N to apo forms</b>                          |                                             |                                             |                                         |                                           |                            |
|----------------------------------------------------------------------|---------------------------------------------|---------------------------------------------|-----------------------------------------|-------------------------------------------|----------------------------|
|                                                                      | <b><math>K_d</math> (<math>\mu</math>M)</b> | <b><math>\Delta G</math><br/>(kcal/mol)</b> | <b><math>\Delta H</math> (kcal/mol)</b> | <b><math>-T\Delta S</math> (kcal/mol)</b> | <b><math>\sigma</math></b> |
| <b>PKA-C<sup>WT</sup></b>                                            | 83 $\pm$ 8                                  | -5.61 $\pm$ 0.06                            | -3.6 $\pm$ 0.1                          | - 2.0 $\pm$ 0.1                           | N/A                        |
| <b>PKA-C<sup>L205R</sup></b>                                         | 215 $\pm$ 15                                | -5.04 $\pm$ 0.04                            | -6.2 $\pm$ 0.3                          | 1.1 $\pm$ 0.2                             | N/A                        |
| <b>PKI<sub>5-24</sub> to apo forms</b>                               |                                             |                                             |                                         |                                           |                            |
|                                                                      | <b><math>K_d</math> (<math>\mu</math>M)</b> | <b><math>\Delta G</math><br/>(kcal/mol)</b> | <b><math>\Delta H</math> (kcal/mol)</b> | <b><math>-T\Delta S</math> (kcal/mol)</b> | <b><math>\sigma</math></b> |
| <b>PKA-C<sup>WT</sup></b>                                            | 17 $\pm$ 2                                  | -6.57 $\pm$ 0.08                            | -10.8 $\pm$ 0.5                         | 4.2 $\pm$ 0.5                             | N/A                        |
| <b>PKA-C<sup>L205R</sup></b>                                         | 61 $\pm$ 5                                  | -5.79 $\pm$ 0.04                            | -9.7 $\pm$ 0.1                          | 3.9 $\pm$ 0.1                             | N/A                        |
| <b>PKI<sub>5-24</sub> to ATP<math>\gamma</math>N saturated forms</b> |                                             |                                             |                                         |                                           |                            |
|                                                                      | <b><math>K_d</math> (<math>\mu</math>M)</b> | <b><math>\Delta G</math><br/>(kcal/mol)</b> | <b><math>\Delta H</math> (kcal/mol)</b> | <b><math>-T\Delta S</math> (kcal/mol)</b> | <b><math>\sigma</math></b> |
| <b>PKA-C<sup>WT</sup></b>                                            | 0.16 $\pm$ 0.02                             | -9.33 $\pm$ 0.07                            | -13.9 $\pm$ 0.5                         | 4.6 $\pm$ 0.4                             | 106 $\pm$ 18               |
| <b>PKA-C<sup>L205R</sup></b>                                         | 10 $\pm$ 3                                  | -6.9 $\pm$ 0.2                              | -8.8 $\pm$ 0.8                          | 1.9 $\pm$ 0.6                             | 6 $\pm$ 2                  |
| <b>VPS36 to ATP<math>\gamma</math>N saturated forms</b>              |                                             |                                             |                                         |                                           |                            |
|                                                                      | <b><math>K_d</math> (<math>\mu</math>M)</b> | <b><math>\Delta G</math><br/>(kcal/mol)</b> | <b><math>\Delta H</math> (kcal/mol)</b> | <b><math>-T\Delta S</math> (kcal/mol)</b> | <b><math>\sigma</math></b> |
| <b>PKA-C<sup>WT</sup></b>                                            | ND                                          | ND                                          | ND                                      | ND                                        | N/A                        |
| <b>PKA-C<sup>L205R</sup></b>                                         | 3.5 $\pm$ 0.1                               | -7.51 $\pm$ 0.03                            | -3.2 $\pm$ 0.6                          | -4.3 $\pm$ 0.6                            | N/A                        |



**Table S2. Kinetic parameters of Kemptide and VPS36 phosphorylation by PKA-C<sup>WT</sup> and PKA-C<sup>L205R</sup>.** Values for  $K_M$  and  $k_{cat}$  were obtained from a non-linear least squares analysis of the concentration-dependent initial phosphorylation rates using a standard coupled enzyme activity assay (related to fig. S4). Error in  $k_{cat}/K_M$  was propagated from error in  $K_M$  and  $k_{cat}$ .

| <b>Kemptide</b>                                                   |                           |                              |
|-------------------------------------------------------------------|---------------------------|------------------------------|
|                                                                   | <b>PKA-C<sup>WT</sup></b> | <b>PKA-C<sup>L205R</sup></b> |
| <b><math>V_{max}</math> (<math>\mu\text{M}/\text{sec}</math>)</b> | $0.42 \pm 0.02$           | $0.90 \pm 0.02$              |
| <b><math>K_M</math> (<math>\mu\text{M}</math>)</b>                | $29 \pm 1$                | $335 \pm 17$                 |
| <b><math>k_{cat}</math> (<math>\text{s}^{-1}</math>)</b>          | $19 \pm 1$                | $41 \pm 1$                   |
| <b><math>k_{cat}/K_M</math></b>                                   | $0.66 \pm 0.04$           | $0.12 \pm 0.01$              |
| <b>VPS36</b>                                                      |                           |                              |
|                                                                   | <b>PKA-C<sup>WT</sup></b> | <b>PKA-C<sup>L205R</sup></b> |
| <b><math>V_{max}</math> (<math>\mu\text{M}/\text{sec}</math>)</b> | $0.12 \pm 0.02$           | $0.39 \pm 0.01$              |
| <b><math>K_M</math> (<math>\mu\text{M}</math>)</b>                | $224 \pm 48$              | $326 \pm 20$                 |
| <b><math>k_{cat}</math> (<math>\text{s}^{-1}</math>)</b>          | $5 \pm 1$                 | $18 \pm 1$                   |
| <b><math>k_{cat}/K_M</math></b>                                   | $0.022 \pm 0.006$         | $0.055 \pm 0.004$            |

**Table S3. PCA and SD of the CONCISE analysis of the structural states analyzed.**

|                                                                      | <b>PCA1</b> | <b>SD</b> | <b>% Closed</b> |
|----------------------------------------------------------------------|-------------|-----------|-----------------|
| <b>PKA-C<sup>WT</sup></b><br><i>Apo</i>                              | -1.213      | 0.56      | 0%              |
| <b>PKA-C<sup>L205R</sup></b><br><i>Apo</i>                           | -1.042      | 0.57      | 7%              |
| <b>PKA-C<sup>WT</sup></b><br><i>ATP<math>\gamma</math>N</i>          | -0.059      | 0.56      | 45%             |
| <b>PKA-C<sup>L205R</sup></b><br><i>ATP<math>\gamma</math>N</i>       | -0.082      | 0.53      | 44%             |
| <b>PKA-C<sup>WT</sup></b><br><i>ATP<math>\gamma</math>N/PKI</i>      | 1.335       | 0.61      | 100%            |
| <b>PKA-C<sup>L205R</sup></b><br><i>ATP<math>\gamma</math>N/PKI</i>   | 0.904       | 0.55      | 83%             |
| <b>PKA-C<sup>WT</sup></b><br><i>ATP<math>\gamma</math>N/VPS36</i>    | -0.072      | 0.54      | 45%             |
| <b>PKA-C<sup>L205R</sup></b><br><i>ATP<math>\gamma</math>N/VPS36</i> | 0.229       | 0.79      | 57%             |

**Table S4.  $T_m$  as determined using CD.** All values are in °C and  $T_m$  was taken as the inflection point at which 50% of the enzyme complex was folded. Error was calculated using triplicate measurements.

|                            | <b>Apo</b> | <b>Binary (MgATP)</b> | <b>Ternary (MgATP + PKI<sub>5-24</sub>)</b> |
|----------------------------|------------|-----------------------|---------------------------------------------|
| <b>PKA<sup>WT</sup></b>    | 53.2 ± 0.5 | 55.0 ± 0.7            | 60.2 ± 0.4                                  |
| <b>PKA<sup>L205R</sup></b> | 53.2 ± 0.4 | 56.7 ± 0.2            | 58.0 ± 0.3                                  |
